1 **Exon 44 skipping in Duchenne muscular dystrophy: NS-089/NCNP-02, an antisense**  
2 **oligonucleotide with a novel connected-sequence design**

3

4 Naoki Watanabe,<sup>1,4</sup> Yuichiro Tone,<sup>1,4</sup> Tetsuya Nagata,<sup>2,3,4</sup> Satoru Masuda,<sup>2</sup> Takashi Saito,<sup>2</sup>  
5 Norio Motohashi,<sup>2</sup> Kazuchika Takagaki,<sup>1</sup> Yoshitsugu Aoki<sup>2</sup> and Shin'ichi Takeda<sup>2</sup>

6

7 <sup>1</sup>Discovery Research Laboratories in Tsukuba, Nippon Shinyaku Co., Ltd, Tsukuba, Ibaraki,  
8 Japan

9 <sup>2</sup>Department of Molecular Therapy, National Institute of Neuroscience, National Center of  
10 Neurology and Psychiatry (NCNP), Kodaira, Tokyo, Japan

11 <sup>3</sup>Department of Neurology and Neurological Science, Graduate School of Medicine, Tokyo  
12 Medical and Dental University, Tokyo, Japan

13 <sup>4</sup>These authors contributed equally to this work.

14

15 Correspondence should be addressed to S.T. ([takeda@ncnp.go.jp](mailto:takeda@ncnp.go.jp)),

16 National Institute of Neuroscience, 4-1-1 Ogawa-higashi, Kodaira, Tokyo 187-8502, Japan

17 Tel.: +81-42-346-1720; Fax: +81-42-346-1750; Email: [takeda@ncnp.go.jp](mailto:takeda@ncnp.go.jp)

18

19 **Short title:** NS-089/NCNP-02 for *DMD* exon 44 skipping

20 ABSTRACT

21 Exon-skipping therapy mediated by antisense oligonucleotides (ASOs) is expected to provide  
22 a therapeutic option for Duchenne muscular dystrophy (DMD). ASOs for exon skipping  
23 reported so far target a single continuous sequence in or around the target exon. In the present  
24 study, we investigated ASOs for exon 44 skipping (applicable to approximately 6% of all DMD  
25 patients) to improve activity by using a novel ASO design incorporating two connected  
26 sequences. Phosphorodiamidate morpholino oligomers targeting two separate sequences in  
27 exon 44 were created to simultaneously target two splicing regulators in exon 44, and their  
28 exon 44 skipping was measured. NS-089/NCNP-02 showed the highest skipping activity  
29 among the oligomers. NS-089/NCNP-02 also induced exon 44 skipping and dystrophin protein  
30 expression in cells from a DMD patient to whom exon 44 skipping is applicable. We also  
31 assessed the *in vivo* activity of NS-089/NCNP-02 by intravenous administration to cynomolgus  
32 monkeys. NS-089/NCNP-02 induced exon 44 skipping in skeletal and cardiac muscle of  
33 cynomolgus monkeys. In conclusion, NS-089/NCNP-02, an ASO with a novel connected-  
34 sequence design, showed both *in vitro* and *in vivo* exon-skipping activity.

35

36

37 INTRODUCTION

38 Duchenne muscular dystrophy (DMD) is an X-chromosome-linked progressive hereditary  
39 muscle disease caused by mutations in the *DMD* gene, which codes for dystrophin, a protein  
40 expressed underneath the muscle-cell membrane. According to estimates from newborn  
41 screening,<sup>1</sup> DMD affects 1 in 3,500 newborn boys and is the most severe and common form of  
42 muscular dystrophy. Mutations in the *DMD* gene can lead to either the severe DMD or the  
43 milder Becker muscular dystrophy (BMD), depending on whether the translational reading  
44 frame is lost or maintained, respectively.<sup>2</sup> DMD is mainly caused by out-of-frame mutations in  
45 the *DMD* gene, which result in a lack of dystrophin. BMD, in contrast, is mostly caused by in-  
46 frame mutations, which result in a reduced amount of dystrophin or a reduction in its molecular  
47 size.

48

49 Exon skipping is a therapeutic approach that uses antisense oligonucleotides (ASOs) to modify  
50 pre-mRNA splicing, thereby correcting the translational reading frame and resulting in an  
51 internally truncated but partially functional protein. Eteplirsen (brand name, Exondys 51) is the  
52 first approved antisense drug for DMD in the USA, and it provides a treatment option for DMD  
53 patients who are amenable to exon 51 skipping (approximately 14% of all DMD patients).<sup>3</sup>  
54 Golodirsen (brand name, Vyondys 53), approved in the USA, and viltolarsen (brand name,  
55 Viltepso), approved in Japan and the USA, are phosphorodiamidate morpholino oligomers  
56 (PMOs) for the treatment of DMD patients who are amenable to exon 53 skipping  
57 (approximately 8% of all DMD patients).<sup>4,5</sup> Casimersen (brand name, Amondys 45), designed  
58 to skip exon 45, was approved in the USA.<sup>6</sup>

59

60 Exon 44 skipping is mainly applicable to patients with deletions in the *DMD* gene consisting  
61 of exons 35–43, 45 or 45–54. Exon 44 skipping is applicable to approximately 6% of DMD

62 patients,<sup>7</sup> and useful antisense sequences against exon 44 are already known.<sup>8–14</sup> It has been  
63 reported that the exon skipping activity could be improved by targeting two sequences around  
64 the target exon using a mixture of two ASOs.<sup>15,16</sup> However, existing ASOs target only a single  
65 continuous sequence in or around exon 44. In this study, we describe the screening of ASOs  
66 based on a novel sequence design created by combining two targeting sequences within a single  
67 ASO. We report the discovery of NS-089/NCNP-02, a PMO for exon 44 skipping, and present  
68 a non-clinical pharmacology study of NS-089/NCNP-02 in human rhabdomyosarcoma (RD)  
69 cells, DMD patient-derived cells and cynomolgus monkeys.

70

## 71 RESULTS

### 72 **Screening of ASOs targeting two separate sequences in exon 44**

73 ASOs 20–30 nt in length targeting two separate sequences in exon 44 were investigated.  
74 Sequence screening involved three steps as described below (see Figure 1) and was evaluated  
75 on the basis of exon 44 skipping activity in RD cells.

76

77 For the first screening, 2'-*O*-methyl phosphorothioate oligonucleotides targeting sequences  
78 within exon 44 were synthesized as an overlapping series of twenty-six 22-mer oligomers.  
79 These oligomers provided coverage of positions 1 to 147 of this 148-nt exon in 5-nt increments  
80 from the 3' to the 5' end. The highest exon 44 skipping efficiency was observed for oligomers  
81 targeting sequences from positions 11–52 and 61–122 of the exon (data not shown). For the  
82 second screening, ten 26-mer PMOs, each consisting of two directly connected 13-mer  
83 targeting sequences, one selected from the region of positions 11–33 and the other from the  
84 region of positions 61–113 of exon 44, were synthesized, and their exon 44 skipping activity  
85 was measured. All 10 PMOs showed skipping activity, and those consisting of the three  
86 combinations of two directly connected sequences from the group of sequences corresponding

87 to positions 21–33, 61–73 and 91–103 showed high skipping activity. For the third screening,  
88 to optimize the sequence, 18–30-mer PMOs consisting of two connected targeting sequences  
89 corresponding to the region of the sequences selected for the second screening were  
90 synthesized, and their exon 44 skipping activity was measured. The PMOs all showed high  
91 skipping activity. The highest skipping activity was shown by a 26-mer PMO consisting of  
92 sequences from positions 19–31 and 89–101 of exon 44, and a 24-mer PMO consisting of  
93 sequences from positions 64–75 and 92–103 of exon 44. Since the activities of the 26-mer and  
94 the 24-mer were similar, the 24-mer, NS-089/NCNP-02, was selected for further study. The  
95 exon skipping efficiency of NS-089/NCNP-02 measured in RD cells showed a dose-dependent  
96 increase with an EC<sub>50</sub> value of 0.83 μmol/L (95% confidence interval, 0.71–0.98 μmol/L;  
97 Figure 2A).

98  
99 To investigate whether the high activity of NS-089/NCNP-02 is related to the fact that the  
100 targeting sequences are part of the same molecule, its exon 44 skipping activity in RD cells  
101 was compared to that of a mixture of two separate 12-mer PMOs corresponding to the same  
102 sequences (positions 64–75 and 92–103 of exon 44). NS-089/NCNP-02 showed a skipping  
103 efficiency of 52.3% at a concentration of 1 μmol/L, whereas the mixture of two separate 12-  
104 mer PMOs each at a concentration of 1 μmol/L showed little activity, about the same as in non-  
105 treated cells (Figure 2B).

106

#### 107 **Exon 44 skipping activity of NS-089/NCNP-02 in cells derived from patients with DMD**

108 We next measured the exon 44 skipping activity of NS-089/NCNP-02 in cells derived from a  
109 DMD patient with deletion of exon 45. Patient fibroblasts were transduced with the human  
110 *MYOD* gene to induce differentiation into myotubes. The myotubes were then treated with NS-  
111 089/NCNP-02 at final concentrations of 0.01, 0.03, 0.1, 0.3, 1, 3 and 10 μmol/L for two days,

112 after which the differentiation medium was replaced with medium containing no NS-  
113 089/NCNP-02. The skipping activity was measured by RT-PCR seven days after the beginning  
114 of treatment (Figure 3A). NS-089/NCNP-02 induced exon 44 skipping in the cells with an EC<sub>50</sub>  
115 value of 0.33  $\mu\text{mol/L}$  (95% confidence interval, 0.22–0.51  $\mu\text{mol/L}$ ; Figure 3B).

116

### 117 **NS-089/NCNP-02-induced expression of dystrophin protein**

118 NS-089/NCNP-02-induced dystrophin protein expression was investigated in cells from a  
119 DMD patient with a deletion of exon 45. Patient fibroblasts were transduced with the human  
120 *MYOD* gene to induce differentiation into myotubes. The myotubes were then treated with NS-  
121 089/NCNP-02 at final concentrations of 0.01, 0.03, 0.1, 0.3, 1, 3 and 10  $\mu\text{mol/L}$  for two days,  
122 after which the differentiation medium was replaced with medium containing no NS-  
123 089/NCNP-02. The expression of dystrophin protein was assessed by western blot analysis  
124 seven days after the beginning of treatment (Figure 3A). When NS-089/NCNP-02 was  
125 transfected into the cells at concentrations of 0.01, 0.03, 0.1, 0.3, 1, 3 and 10  $\mu\text{mol/L}$ , the  
126 expression of dystrophin protein was 4.7%, 5.1%, 14.0%, 13.5%, 21.8%, 19.3% and 38.0%,  
127 respectively, of the expression of dystrophin protein in a cell lysate of myotubes differentiated  
128 from normal human fibroblasts by transduction with *MYOD*. (Figure 4A and 4B).

129

### 130 **Exon 44 skipping after transfection for a short incubation time**

131 In the clinical setting, PMOs for DMD exon skipping are administered by weekly intravenous  
132 infusion. However, PMOs are known to be cleared from the blood with an elimination half-life  
133 of about 2 h after intravenous administration.<sup>17</sup> To investigate exon 44 skipping activity after  
134 transfection for a short incubation time, the exon 44 skipping activity of NS-089/NCNP-02  
135 after a 1-h transfection was measured in cells from a DMD patient with deletion of exon 45.  
136 Patient fibroblasts were transduced with the human *MYOD* gene to induce differentiation into

137 myotubes. The myotubes were then treated with NS-089/NCNP-02 for 1 h at final  
138 concentrations of 0.01, 0.03, 0.1, 0.3, 1, 3 and 10  $\mu\text{mol/L}$ . The exon 44 skipping activity was  
139 measured by RT-PCR seven days after the beginning of treatment (Figure 5A). NS-089/NCNP-  
140 02 induced exon 44 skipping with an  $\text{EC}_{50}$  value of 0.63  $\mu\text{mol/L}$  (95% confidence interval,  
141 0.40–0.98  $\mu\text{mol/L}$ ; Figure 5B).

142

### 143 **Exon 44 skipping in cynomolgus monkeys**

144 Finally, we assessed the *in vivo* activity of NS-089/NCNP-02 in cynomolgus monkeys.  
145 Although there is a single base difference between the target sequence of NS-089/NCNP-02 in  
146 cynomolgus monkeys and humans, we confirmed that NS-089/NCNP-02 showed exon 44  
147 skipping activity in cultured monkey cells (data not shown). When NS-089/NCNP-02 was  
148 administered intravenously to cynomolgus monkeys once weekly for 13 weeks (Figure 6A),  
149 and the exon 44 skipping activity was measured in skeletal muscle (the right gastrocnemius  
150 muscle) the day after the last administration, the skipping efficiencies were 0.0%, 0.6%, 2.1%  
151 and 9.5% at doses of 0, 200, 600 and 2000 mg/kg, with significant skipping activity at 200,  
152 600 and 2000 mg/kg (Figure 6B). The corresponding skipping efficiencies in cardiac muscle  
153 (the left ventricular apex) were 0.0%, 0.3%, 0.4% and 1.4%, with significant skipping activity  
154 at 600 and 2000 mg/kg (Figure 6C). In addition, NS-089/NCNP-02 was administered  
155 intravenously to cynomolgus monkeys once weekly for 13 weeks, and the exon 44 skipping  
156 activity was measured in skeletal muscle at the end of an eight-week recovery period (Figure  
157 7A). The skipping efficiencies were 0.0%, 3.1% and 16.2% at doses of 0, 600 and 2000 mg/kg,  
158 with significant skipping activity at 2000 mg/kg (Figure 7B). The corresponding skipping  
159 efficiencies in cardiac muscle were 0.0%, 0.0% and 0.8%, and the skipping activity was not  
160 significant (Figure 7C).

161

162 DISCUSSION

163 In this study, PMOs based on a novel design involving directly connected sequences targeting  
164 different parts of the exon were screened, and NS-089/NCNP-02 was found to have the highest  
165 exon 44 skipping activity. A combination of two ASOs has been reported to improve exon  
166 skipping activity.<sup>15,16</sup> However, no previous report has shown that a single-strand ASO  
167 containing sequences targeting two or more sites in the same exon exhibits skipping activity.  
168 We have now found that enhanced exon 44 skipping activity was shown by 18–30-mer single-  
169 strand ASOs that target two separate sequences within exon 44. Positions 11–52 and 61–122  
170 of exon 44 were identified as high skipping regions in the first screening. Combinations of  
171 positions 21–33 and 61–73 or 91–103 selected from positions 11–52 and 61–122, respectively,  
172 and a combination of positions 61–73 and 91–103, both selected from positions 61–122,  
173 showed high skipping activity. This novel type of ASO with two connected sequences expands  
174 the possibilities for creating highly active new sequences.

175

176 In contrast to the substantial exon 44 skipping activity shown by NS-089/NCNP-02, little  
177 activity was shown by a mixture of two separate 12-mer PMOs with exactly the same targeting  
178 sequences as NS-089/NCNP-02. Because PMOs less than 14 bases in length are expected to  
179 be inactive<sup>18</sup>, NS-089/NCNP-02 can be assumed to have induced exon 44 skipping by binding  
180 to both target sequences. The result obtained with NS-089/NCNP-02 is consistent with the idea  
181 that a single strand can simultaneously bind to two separate sites in the same exon and induce  
182 exon skipping.

183

184 NS-089/NCNP-02 showed exon 44 skipping activity and promoted dystrophin protein  
185 expression in *MYOD*-converted fibroblasts from a DMD patient. The EC<sub>50</sub> value for the exon  
186 44 skipping activity five days after a two-day treatment with NS-089/NCNP-02 was 0.33



187  $\mu\text{mol/L}$ . The  $\text{EC}_{50}$  value for the exon 44 skipping activity seven days after a 1-h treatment with  
188 NS-089/NCNP-02 was  $0.63 \mu\text{mol/L}$ . Thus, exon 44 skipping activity was sustained for seven  
189 days even when the contact time with the cells was shortened to 1 h. From these results, even  
190 though PMOs are cleared from the blood quickly after intravenous administration, NS-  
191 089/NCNP-02 can be expected to have an appreciable therapeutic effect. In the phase II study  
192 of viltolarsen in the US/Canada, dystrophin protein expression and exon 53 skipping activity  
193 were seen after treatment with viltolarsen, and preliminary results of timed function tests  
194 suggest clinical improvement in DMD boys.<sup>19</sup> In a preclinical study, the  $\text{EC}_{50}$  value for the  
195 exon 53 skipping activity five days after a two-day treatment with viltolarsen delivered with  
196 the transfection reagent Endo-Porter was  $0.82 \mu\text{mol/L}$  in cells from a DMD patient with  
197 deletion of exons 45–52.<sup>20</sup> The  $\text{EC}_{50}$  value for the exon 44 skipping activity five days after a  
198 two-day treatment with NS-089/NCNP-02 without a transfection reagent was  $0.33 \mu\text{mol/L}$ . The  
199 skipping efficiency was 31.9% one week after a 1-h treatment with viltolarsen at  $10 \mu\text{mol/L}$   
200 with Endo-Porter<sup>20</sup> and 72.0% one week after a 1-h treatment with NS-089/NCNP-02 at the  
201 same concentration without a transfection reagent. Thus, NS-089/NCNP-02 showed higher  
202 exon 44 skipping activity than viltolarsen even though a transfection reagent was not used.

203

204 By exon 44 skipping, a dystrophin protein with the parts corresponding to exons 35–44, 44–45  
205 or 44–54 deleted would be expected to be expressed in DMD patients with deletion of exons  
206 35–43, 45 or 45–54, respectively.<sup>21</sup> The shorter dystrophin protein induced by exon 44 skipping  
207 therapies is expected to be partially functional because deletion of exons 44–45 has only been  
208 reported three times, which suggests an ascertainment bias attributable to a very mild  
209 phenotype.<sup>22</sup> Additionally, there are three reports of asymptomatic cases with deletions of  
210 exons 35–44, 38–44 and 41–44.<sup>23–25</sup>

211

212 To investigate the activity of NS-089/NCNP-02 *in vivo*, exon 44 skipping activity was  
213 measured in skeletal and cardiac muscle of cynomolgus monkeys. PMOs more efficiently enter  
214 fibers that are involved in active muscle regeneration, such as those which occur in DMD  
215 patients, than fibers of normal skeletal muscle.<sup>26</sup> Even though exon 44 skipping is of low  
216 efficiency in the normal skeletal muscle of cynomolgus monkeys, exon 44 skipping is expected  
217 to be highly efficient in the skeletal muscle of DMD patients. Although it is generally difficult  
218 for PMOs to enter cardiomyocytes,<sup>27,28</sup> some exon 44 skipping was induced by NS-089/NCNP-  
219 02 in the cardiac muscle of cynomolgus monkeys.

220

221 An investigator-initiated phase I/II study of NS-089/NCNP-02 demonstrated an increase in  
222 dystrophin protein expression and suggested maintenance of motor function or a trend in its  
223 improvement.<sup>29</sup> Our data support these clinical results.

224

225 In conclusion, we describe the activity of NS-089/NCNP-02, a PMO for exon 44 skipping  
226 based on a novel design involving linked sequences targeting two sites in the same exon. NS-  
227 089/NCNP-02 induced exon 44 skipping and dystrophin protein expression both in cells  
228 derived from a patient with DMD amenable to exon 44 skipping and in the skeletal and cardiac  
229 muscle of cynomolgus monkeys.

230

## 231 MATERIALS AND METHODS

### 232 **Antisense oligomers**

233 2'-*O*-Methyl phosphorothioate oligonucleotides were purchased from Japan Bio Services Co.,  
234 Ltd (Saitama, Japan). PMOs were synthesized by Nippon Shinyaku Co., Ltd.

235

### 236 **Cells**

237 RD cells were obtained from the Health Science Research Resources Bank and cultured under  
238 5% CO<sub>2</sub> at 37°C in Eagle's minimum essential medium (Sigma-Aldrich, St. Louis, MO, USA)  
239 containing 10% fetal bovine serum. Fibroblasts from a DMD patient with a deletion of exon  
240 45 of the *DMD* gene (GM05112) were obtained from the Coriell Institute for Medical Research.  
241 Fibroblasts were cultured and induced to differentiate into myotubes by *MYOD* conversion as  
242 previously described.<sup>20</sup>

243

### 244 **Transfection of PMOs into cells**

245 PMOs were dissolved in distilled water and transfected into RD cells using the Amaxa Cell  
246 Line Nucleofector Kit L and a Nucleofector II electroporation device (Lonza, Basel,  
247 Switzerland) with program T-030 or into cells from a DMD patient without a transfection  
248 reagent.

249

### 250 **Reverse transcriptase polymerase chain reaction (RT-PCR)**

251 Total RNA was extracted from RD cells or cells from a DMD patient, and RT-PCR was  
252 performed as previously described.<sup>18</sup> From approximately 15-mg pieces of tissue obtained from  
253 2-year-old male cynomolgus monkeys in a 13-week intermittent intravenous dose toxicity  
254 study of NS-089/NCNP-02 followed by an 8-week recovery period (study approved by the  
255 Institutional Animal Care and Use Committee of Nippon Shinyaku Co., Ltd; approval no.

256 17062701), total RNA was extracted using TissueLyser II (Qiagen, Valencia, CA, USA) and  
257 NucleoSpin RNA (Macherey-Nagel, Düren, Germany). RNA concentrations were determined  
258 from the absorbance at 260 nm using a NanoDrop ND-1000 spectrophotometer (Thermo Fisher  
259 Scientific, Waltham, MA, USA). RT-PCR was performed with 200 ng of extracted total RNA  
260 using a Qiagen OneStep RT-PCR Kit (Qiagen). The primers used were a forward primer  
261 (Hokkaido System Science, Sapporo, Japan) designed for exon 43 (5'-  
262 GCTCAGGTCGGATTGACATT-3') and a reverse primer (Hokkaido System Science)  
263 designed for exon 47 (5'-GGGCAACTCTTCCACCAGTA-3') so as to exclude exon 44. RT-  
264 PCR was performed with a Takara Thermal Cycler Dice<sup>®</sup> Touch (Takara Bio, Kusatsu, Japan).  
265 The RT-PCR program was as follows: reverse transcription at 50°C for 30 min, heat  
266 denaturation at 95°C for 15 min and 35 cycles consisting of denaturation at 94°C for 1 min,  
267 annealing at 60°C for 1 min, and extension at 72°C for 1 min, followed by a final extension at  
268 72°C for 10 min. The PCR reaction products were analyzed using a 2100 Bioanalyzer (Agilent  
269 Technologies, Waldbronn, Germany). The skipping efficiency was determined from the  
270 molarity of the PCR products by the following expression: (PCR reaction products without  
271 exon 44) × 100 / [(PCR reaction products without exon 44) + (PCR reaction products with exon  
272 44)].

273

#### 274 **Western blotting**

275 Western blotting was performed on lysates of cells from a DMD patient, and the results were  
276 analyzed as previously described.<sup>20</sup>

277

#### 278 **Statistical analysis**

279 All analyses were performed using SAS software (Ver. 9.3; SAS Institute, Cary, NC, USA)  
280 and EXSUS (Ver. 8.0.0; CAC Exicare, Tokyo, Japan). The skipping efficiencies obtained were

281 analyzed by nonlinear regression using a two-parameter logistic model to calculate EC<sub>50</sub> values.

282

### 283 **Author contributions**

284 N.W., Y.T., T.N., S.M. and T.S. performed the experiments, N.M., T.N., K.T., Y.A. and S.T.

285 coordinated and supervised the project, and N.W. wrote the manuscript.

286

### 287 **Keywords**

288 Duchenne muscular dystrophy, dystrophin, exon 44, exon skipping, antisense therapeutics,

289 morpholino

290

### 291 **Data availability**

292 All data are included in the manuscript. Raw data are available on request.

293

### 294 **Acknowledgments**

295 The authors wish to thank Dr. Gerald E. Smyth for his assistance in preparing the manuscript.

296 The work was performed in Kodaira, Tokyo, and Tsukuba, Ibaraki, Japan.

297

### 298 **Declaration of interests**

299 NCNP and Nippon Shinyaku Co., Ltd, are jointly developing NS-089/NCNP-02 for the

300 treatment of DMD. This study was funded by Nippon Shinyaku Co., Ltd.

301

302 REFERENCES

- 303 1. Emery, A.E. (1991). Population frequencies of inherited neuromuscular diseases—a  
304 world survey. *Neuromuscul. Disord.* *1*, 19–29.
- 305 2. Koenig, M., Beggs, A.H., Moyer, M., Scherpf, S., Heindrich, K., Bettecken, T., Meng,  
306 G., Müller, C.R., Lindlöf, M., Kaariainen, H., *et al.* (1989). The molecular basis for  
307 Duchenne versus Becker muscular dystrophy: correlation of severity with type of  
308 deletion. *Am. J. Hum. Genet.* *45*, 498–506.
- 309 3. Rodrigues, M., and Yokota, T. (2018). An overview of recent advances and clinical  
310 applications of exon skipping and splice modulation for muscular dystrophy and  
311 various genetic diseases. *Methods Mol. Biol.* *1828*, 31–55.
- 312 4. Heo, Y.-A. (2020). Golodirsen: first approval. *Drugs* *80*, 329–333.
- 313 5. Dhillon, S. (2020). Viltolarsen: first approval. *Drugs* *80*, 1027–1031.
- 314 6. Shirley, M. (2021). Casimersen: first approval. *Drugs* *81*, 875–879.
- 315 7. Aartsma-Rus, A., Fokkema, I., Verschuuren, J., Ginjaar, I., van Deutekom, J., van  
316 Ommen, G.-J., and den Dunnen, J.T. (2009). Theoretic applicability of antisense-  
317 mediated exon skipping for Duchenne muscular dystrophy mutations. *Hum. Mutat.* *30*,  
318 293–299.
- 319 8. Aartsma-Rus, A., Bremmer-Bout, M., Janson, A.A.M., den Dunnen, J.T., van Ommen,  
320 G.-J.B., and van Deutekom, J.C.T. (2002). Targeted exon skipping as a potential gene  
321 correction therapy for Duchenne muscular dystrophy. *Neuromuscul. Disord.* *12*, S71–  
322 S77.
- 323 9. Matsuo, M., Takeshima, Y., and Koizumi, M. (2004). ENA nucleic acid drugs  
324 modifying splicing in mRNA precursor. International patent WO/2004/048570.
- 325 10. Wilton, S.D., Fletcher, S., and McClorey, G. (2006). Antisense oligonucleotides for  
326 inducing exon skipping and methods of use thereof. International patent

- 327 WO/2006/000057.
- 328 11. Platenburg, G.J., de Kimpe, J.J., van Deutekom, J.C.T., van Ommen, G.-J.B., and  
329 Aartsma-Rus, A. (2009). Method for efficient exon (44) skipping in Duchenne muscular  
330 dystrophy and associated means. International patent WO/2009/139630.
- 331 12. Sazani, P., and Kole, R. (2010). Multiple exon skipping compositions for DMD.  
332 International patent WO/2010/048586.
- 333 13. Popplewell, L.J., Trollet, C., Dickson, G., and Graham, I.R. (2009). Design of  
334 phosphorodiamidate morpholino oligomers (PMOs) for the induction of exon skipping  
335 of the human *DMD* Gene. *Mol. Ther.* *17*, 554–561.
- 336 14. Wilton, S., Fletcher, S., Adams, A., and Meloni, P. (2011). Antisense molecules and  
337 methods for treating pathologies. International patent WO/2011/057350.
- 338 15. Wilton, S.D., Fall, A.M., Harding, P.L., McClorey, G., Coleman, C., and Fletcher, S.  
339 (2007). Antisense oligonucleotide-induced exon skipping across the human dystrophin  
340 gene transcript. *Mol. Ther.* *15*, 1288–1296.
- 341 16. Aoki, Y., Nakamura, A., Yokota, T., Saito, T., Okazawa, H., Nagata, T., and Takeda,  
342 S. (2010). In-frame dystrophin following exon 51-skipping improves muscle pathology  
343 and function in the exon 52-deficient *mdx* mouse. *Mol Ther.* *18*, 1995–2005.
- 344 17. Komaki, H, Takeshita, Y., Matsumura, T., Ozasa, S., Funato, M., Takeshita, E., and  
345 Iwata, Y. (2020). Viltolarsen in Japanese Duchenne muscular dystrophy patients: A  
346 phase 1/2 study. *Ann Clin Transl Neurol.* *7*, 2393–2408.
- 347 18. Summerton, J. (1999). Morpholino antisense oligomers: the case for an RNase H-  
348 independent structural type. *Biochim. Biophys. Acta* *1489*, 141–158.
- 349 19. Clemens, P.R., Rao, V.K., Connolly, A.M., Harper A.D., Mah, J.K., Smith, E.C.,  
350 McDonald, C.M., Zaidman, C.M., Morgenroth, L.P., Osaki, H., *et al.* (2020). Safety,  
351 tolerability, and efficacy of viltolarsen in boys with Duchenne muscular dystrophy

- 352           amenable to exon 53 skipping. A phase 2 randomized clinical trial. *JAMA Neurol.* *77*,  
353           1–10.
- 354   20.    Watanabe, N., Nagata, T., Satou, Y., Masuda, S., Saito, T., Kitagawa, H., Komaki, H.,  
355           Takagaki, K., and Takeda, S. (2018). NS-065/NCNP-01: an antisense oligonucleotide  
356           for potential treatment of exon 53 skipping in Duchenne muscular dystrophy. *Mol. Ther.*  
357           *Nucleic Acids* *13*, 442–449.
- 358   21.    van Deutekom, J.C.T., Bremmer-Bout, M., Janson, A.A.M., Ginjaar, I.B., Baas, F.,  
359           Dunnen, J.T., and van Ommen, G.-J.B. (2001). Antisense-induced exon skipping  
360           restores dystrophin expression in DMD patient derived muscle cells. *Hum. Mol. Genet.*  
361           *10*, 1547–1554.
- 362   22.    Findlay, A.R., Wein, N., Kaminoh, Y., Taylor, L.E., Dunn, D.M., Mendell, J.R., King,  
363           W.M., Pestronk, A., Florence, J.M., Mathews, K.D., *et al.* (2015). Clinical phenotypes  
364           as predictors of the outcome of skipping around *DMD* exon 45. *Ann. Neurol.* *77*, 668–  
365           674.
- 366   23.    Beggs, A.H., Hoffman, E.P., Snyder, J.R., Arahata, K., Specht, L., Shapiro, F., Angelini,  
367           C., Sugita, H., and Kunkel, L.M. (1991). Exploring the molecular basis for variability  
368           among patients with Becker muscular dystrophy: dystrophin gene and protein studies.  
369           *Am. J. Hum. Genet.* *49*, 54–67.
- 370   24.    Zatz, M., Pavanello, R.deC.M., Lourenço, N.C.V., Cerqueira, A., Lazar, M., and  
371           Vainzof M. (2012). Assessing pathogenicity for novel mutation/sequence variants: the  
372           value of healthy older individuals. *Neuromol. Med.* *14*, 281–284.
- 373   25.    Comi, G.P., Prella, A., Bresolin, N., Moggio, M., Bardoni, A., Gallanti, A., Vita, G.,  
374           Toscano, A., Ferro, M.T., Bordoni, A., *et al.* (1994). Clinical variability in Becker  
375           muscular dystrophy. Genetic, biochemical and immunohistochemical correlates. *Brain*  
376           *117*, 1–14.



- 377 26. Aoki, Y., Nagata, T., Yokota, T., Nakamura, A., Wood, M.J.A., Partridge, T., and  
378 Takeda, S. (2013). Highly efficient *in vivo* delivery of PMO into regenerating myotubes  
379 and rescue in laminin- $\alpha$ 2 chain-null congenital muscular dystrophy mice. *Hum. Mol.*  
380 *Genet.* 22, 4914–4928.
- 381 27. Alter, J., Lou, F., Rabinowitz, A., Yin, H., Rosenfeld, J., Wilton, S.D., Partridge, T.A.,  
382 and Lu, Q.L. (2006). Systemic delivery of morpholino oligonucleotide restores  
383 dystrophin expression bodywide and improves dystrophic pathology. *Nat. Med.* 12,  
384 175–177.
- 385 28. Wu, B., Lu, P., Benrashid, E., Malik, S., Ashar, J., Doran, T.J., and Lu, Q.L. (2010).  
386 Dose-dependent restoration of dystrophin expression in cardiac muscle of dystrophic  
387 mice by systemically delivered morpholino. *Gene Ther.* 17, 132–140.
- 388 29. <https://www.ncnp.go.jp/topics/2022/20220317e.html> (retrieved November 24, 2022)  
389

390 FIGURE LEGENDS

391 **Figure 1. Overview of strategy for screening sequences for exon 44 skipping.**

392

393 **Figure 2. Exon 44 skipping activity of NS-089/NCNP-02 and a mixture of its partial**  
394 **sequences**

395 (A) NS-089/NCNP-02 at concentrations of 0.1, 0.3, 1, 3, 10 and 30  $\mu\text{mol/L}$  or (B) NS-  
396 089/NCNP-02 or a mixture of its two partial sequences was transfected into RD cells with  
397 Nucleofector, and exon skipping was measured after three days using RT-PCR. NT, non-  
398 treated cells used as a negative control. Each point and bar shows the mean  $\pm$  standard deviation  
399 (n = 3).

400

401 **Figure 3. Exon 44 skipping activity of NS-089/NCNP-02 in cells derived from a DMD**  
402 **patient with a deletion of exon 45.**

403 (A) Schedule of PMO transfection for RT-PCR and western blotting. (B) Exon 44 skipping  
404 activity seven days after the start of a two-day treatment with NS-089/NCNP-02 of cells  
405 derived from a DMD patient with a deletion of exon 45. Each point shows the mean  $\pm$  standard  
406 deviation (n = 4).

407

408 **Figure 4. Expression of dystrophin protein seven days after the start of a two-day**  
409 **treatment with NS-089/NCNP-02 of cells derived from a DMD patient with deletion of**  
410 **exon 45.**

411 (A) Western blot analysis of dystrophin protein expression in the cells one week after  
412 transfection with NS-089/NCNP-02 over a period of two days. The positive control (P.C.) was  
413 a cell lysate of myotubes differentiated from normal human fibroblasts by transduction with  
414 *MYOD*. Samples were run in quadruplicate. (B) Densitometric analysis of the western blots

415 relative to each P.C. on the same membrane. Each point shows the mean  $\pm$  standard deviation  
416 (n = 4).

417

418 **Figure 5. Exon 44 skipping activity seven days after the start of a 1-h treatment with NS-**  
419 **089/NCNP-02 of cells derived from a DMD patient with deletion of exon 45.**

420 (A) Schedule of PMO transfection for RT-PCR. (B) Each point shows the mean  $\pm$  standard  
421 deviation (n = 4).

422

423 **Figure 6. Exon 44 skipping activity in skeletal and cardiac muscle of cynomolgus monkeys**  
424 **at the end of a 13-week treatment period.**

425 (A) Schedule of PMO injection and RT-PCR. (B and C) Exon skipping was measured using  
426 RT-PCR in (B) skeletal muscle or (C) cardiac muscle. Each bar represents the mean and  
427 standard deviation (n = 5). Shirley–Williams multiple comparison test (one-sided) versus 0  
428 mg/kg (saline) group. n.s., no significant difference; \*, p < 0.005; \*\*\*, p < 0.0005.

429

430 **Figure 7. Exon 44 skipping activity in skeletal and cardiac muscle of cynomolgus monkeys**  
431 **at the end of an eight-week recovery period.**

432 (A) Schedule of PMO injection and RT-PCR. (B and C) Exon skipping was measured using  
433 RT-PCR in (B) skeletal muscle or (C) cardiac muscle. Each bar represents the mean and  
434 standard deviation (n = 2). Shirley–Williams multiple comparison test (one-sided) versus 0  
435 mg/kg (saline) group. n.s., no significant difference.

436 Figure 1  
437

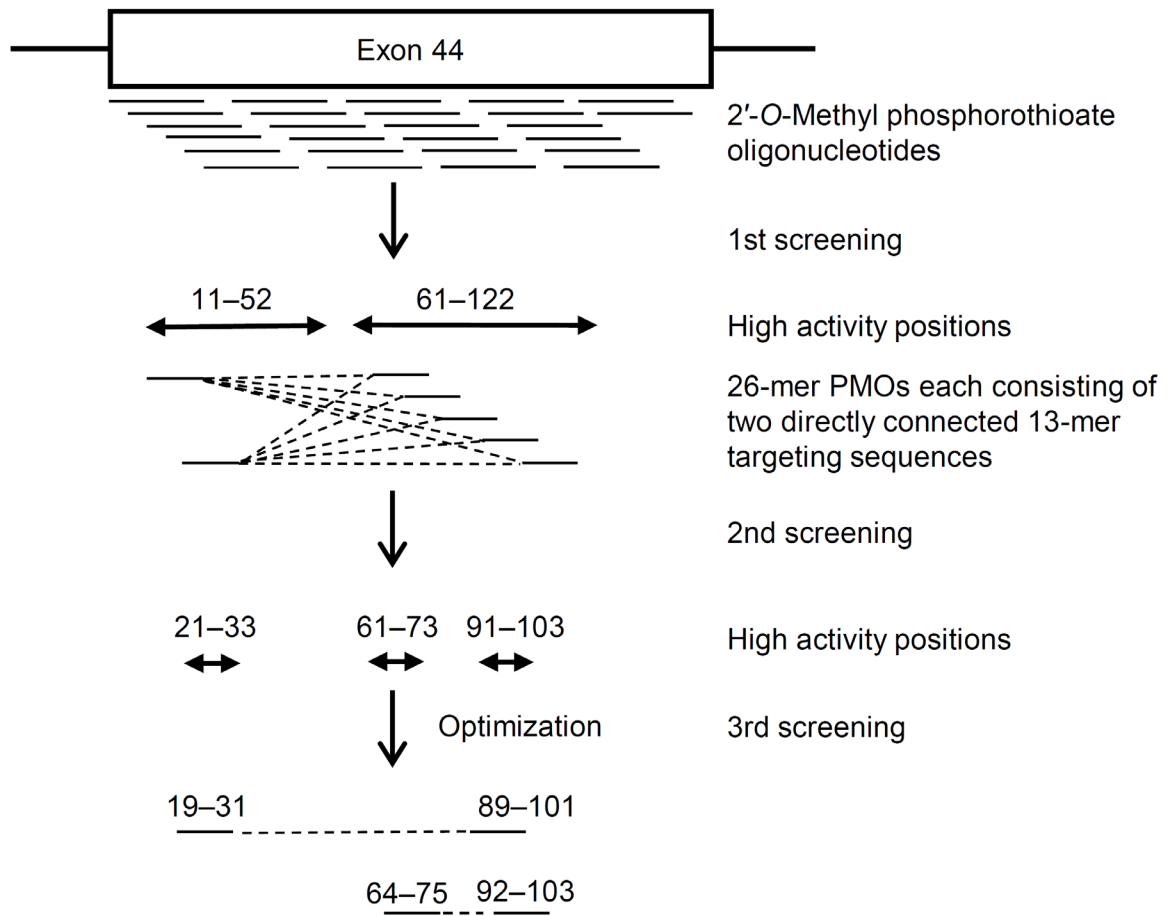

438 Figure 2

A

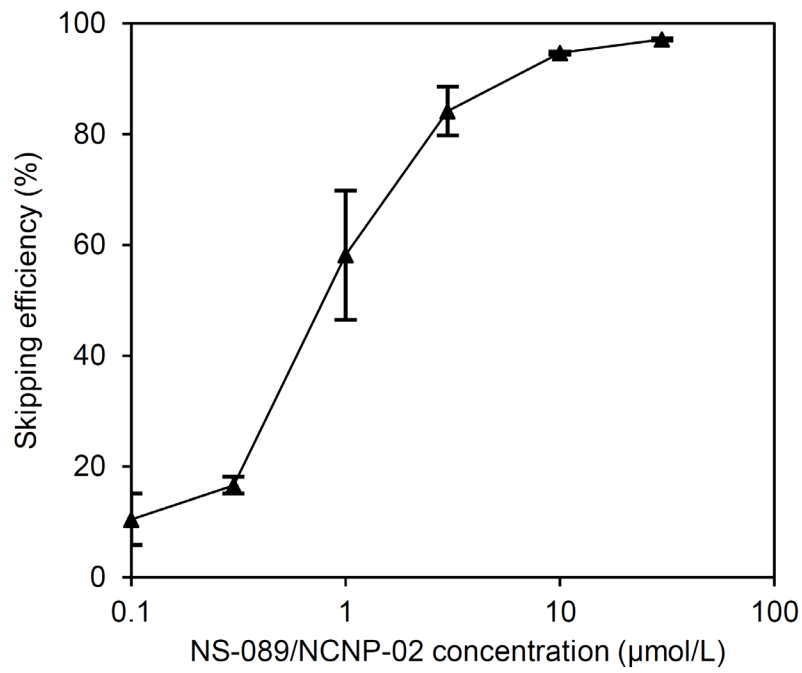

B

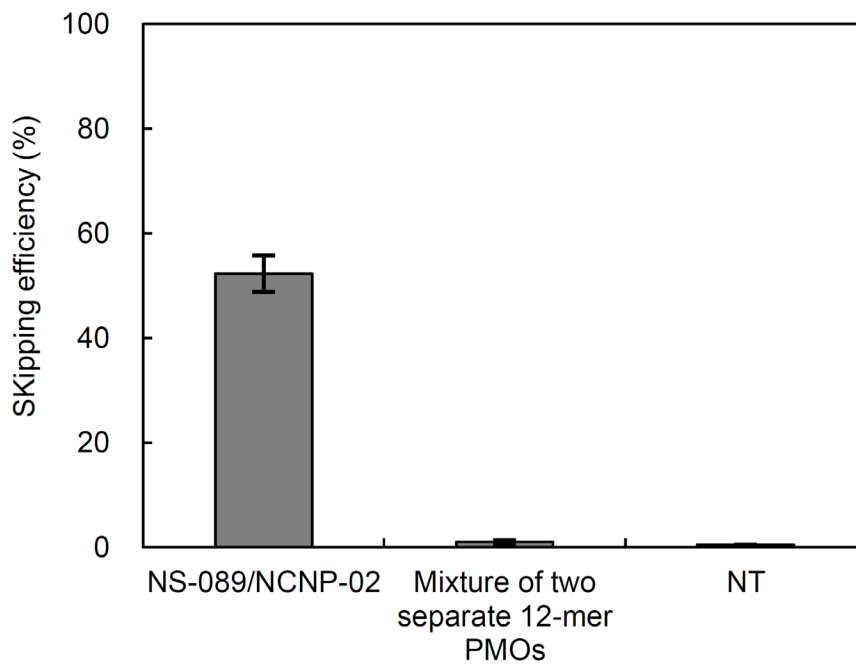

439

440

441 Figure 3

442

A

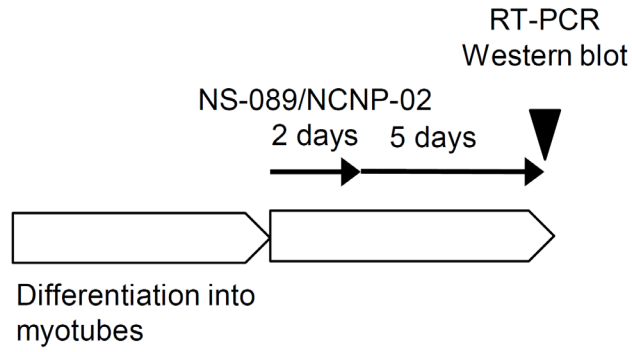

B

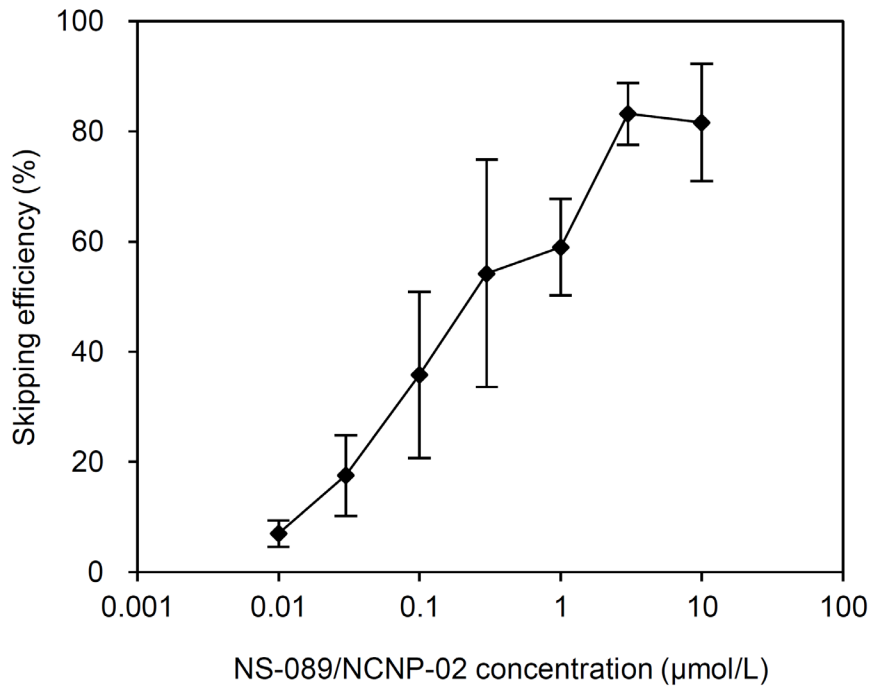

443

444

445

446

447

448

449 Figure 4

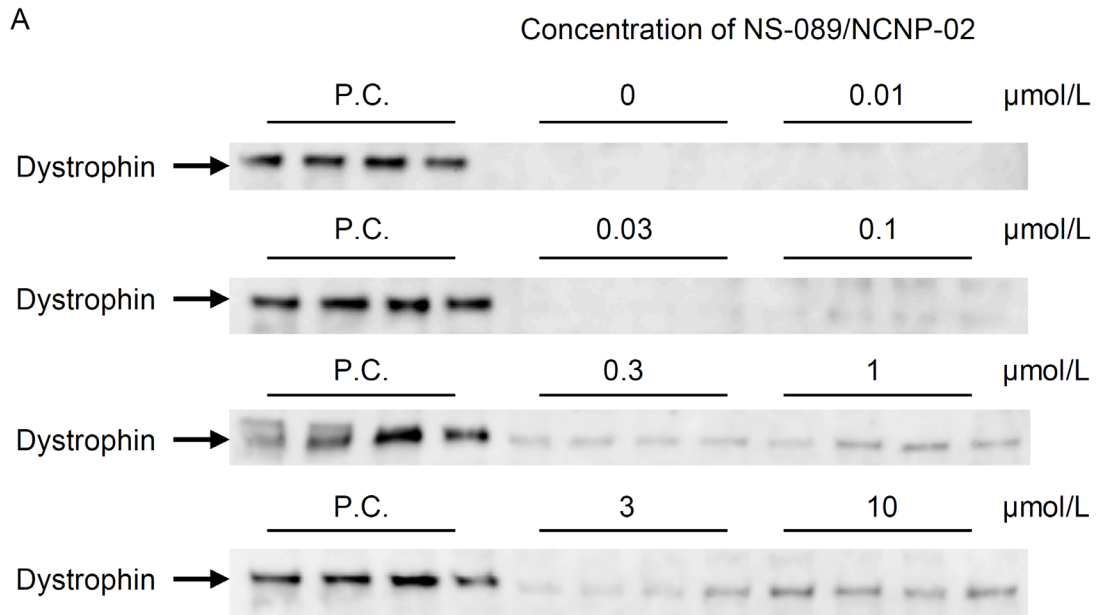

B

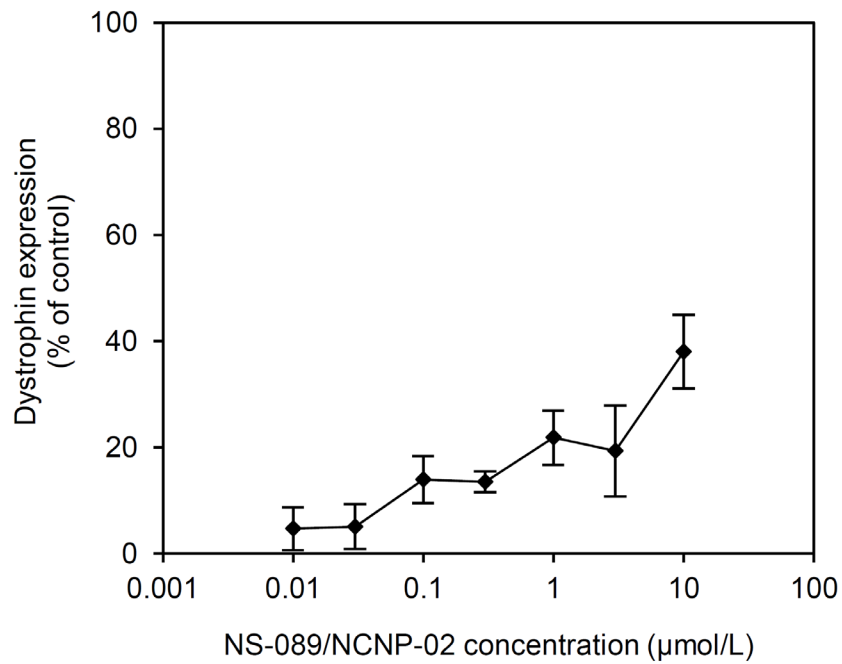

450

451

452

453

454 Figure 5

A

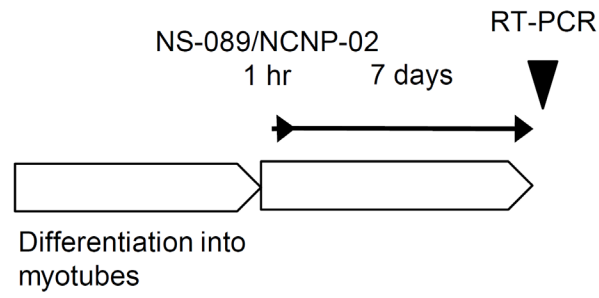

B

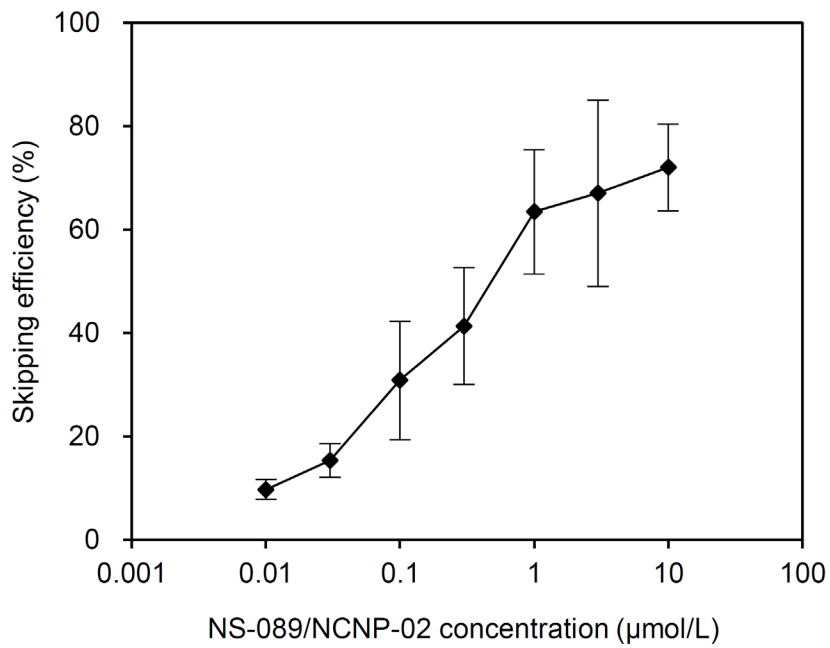

455

456

457

458

459

460

461

462

463

464



465 Figure 6

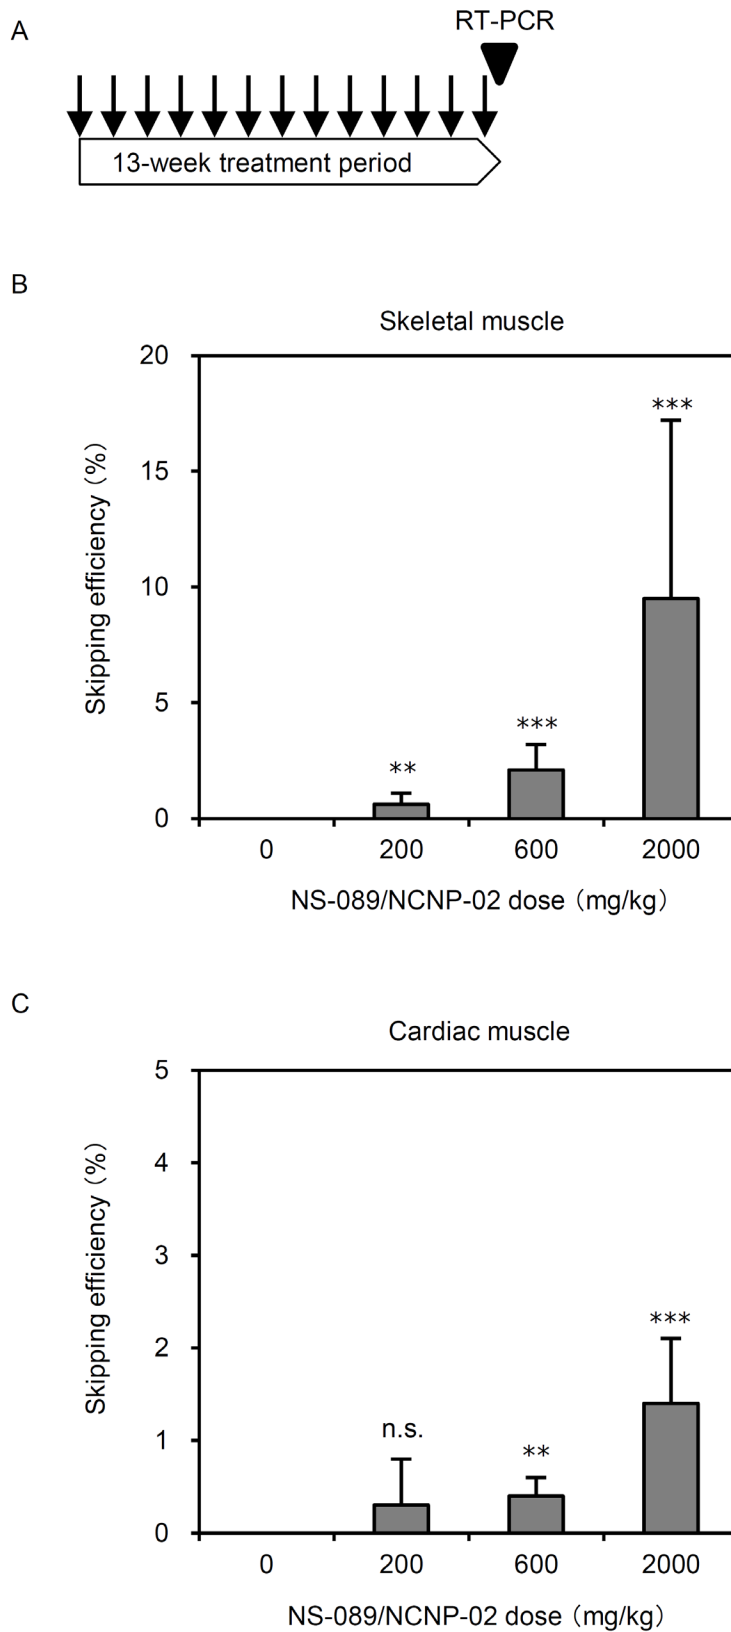

466

467 Figure 7

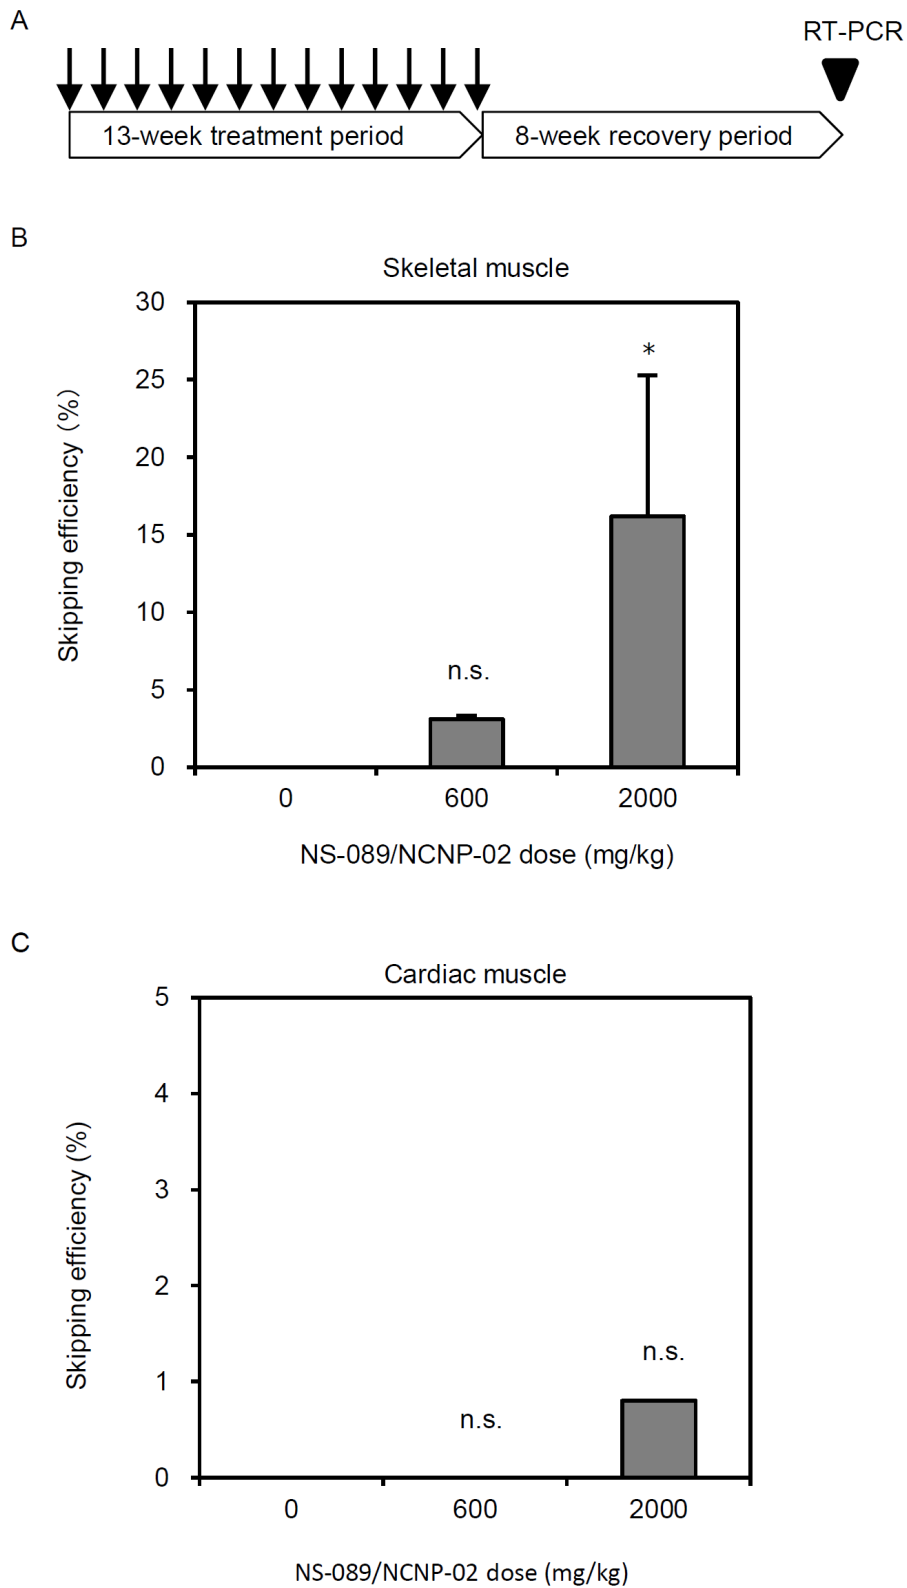

468

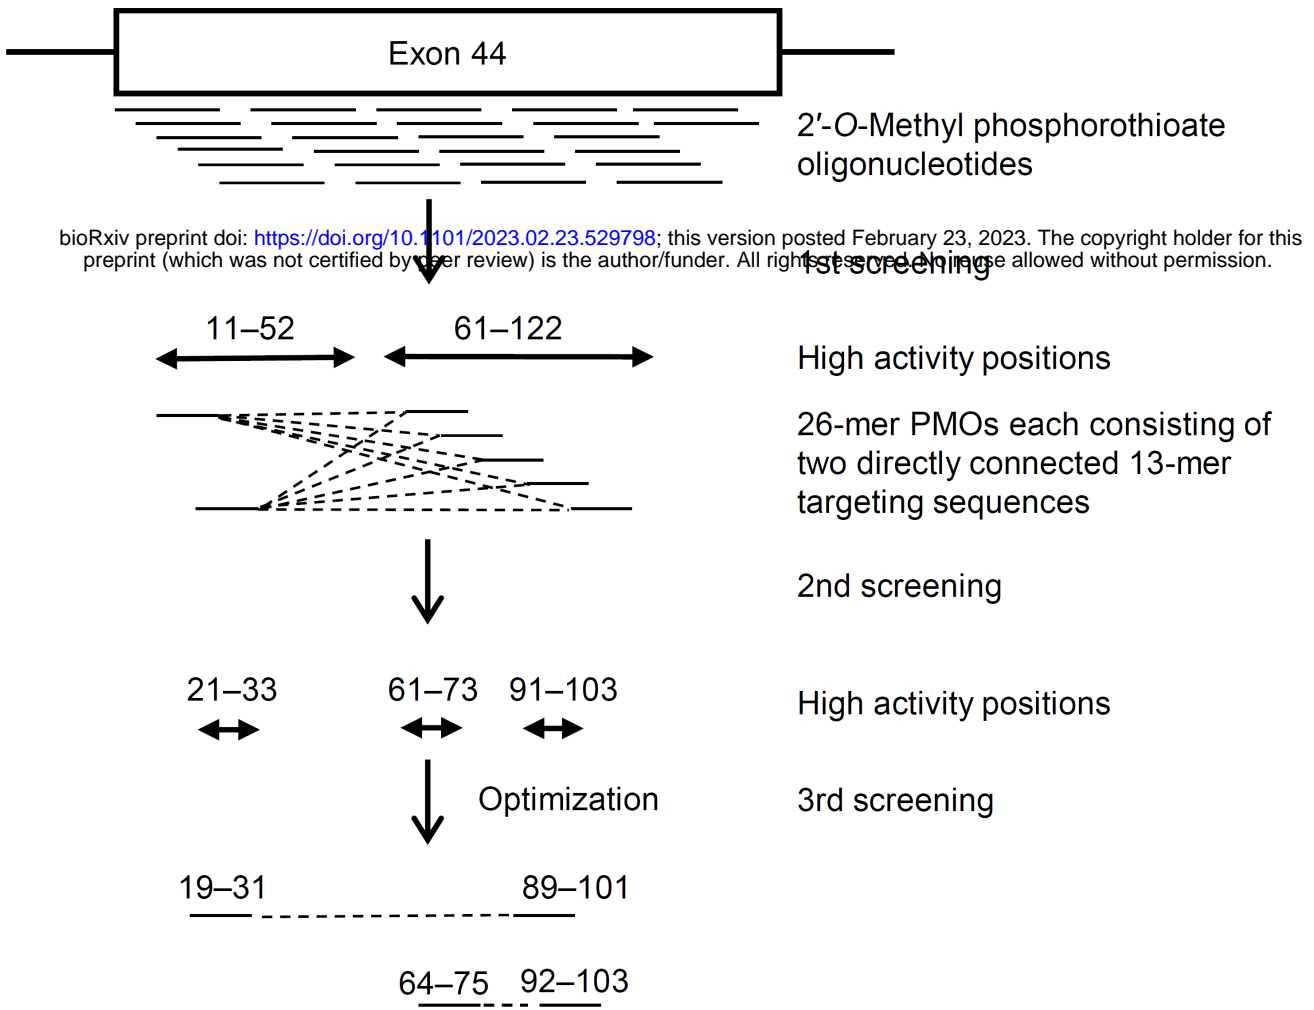

Figure 1

A

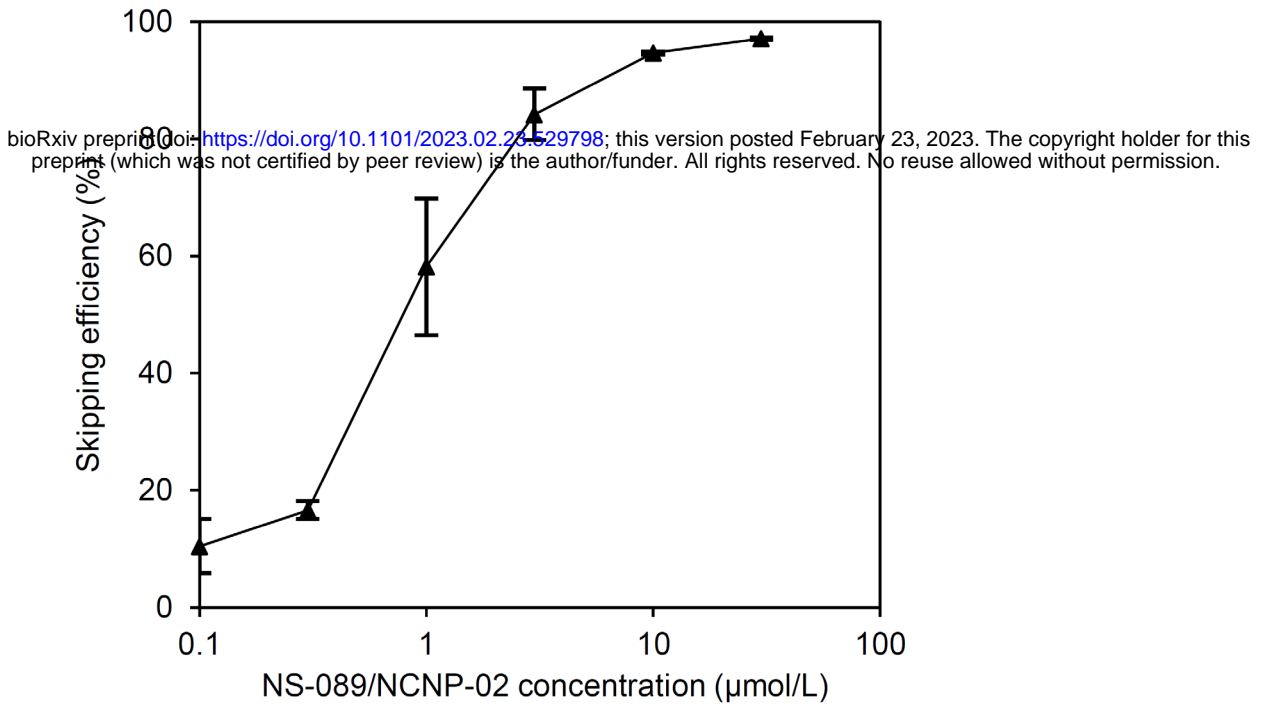

B

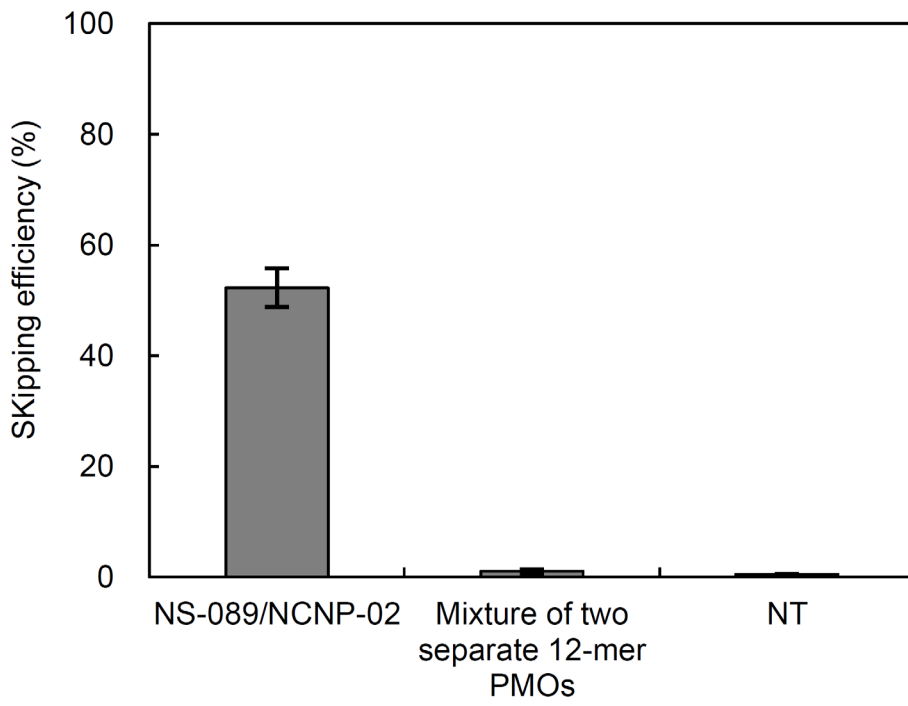

Figure 2

A

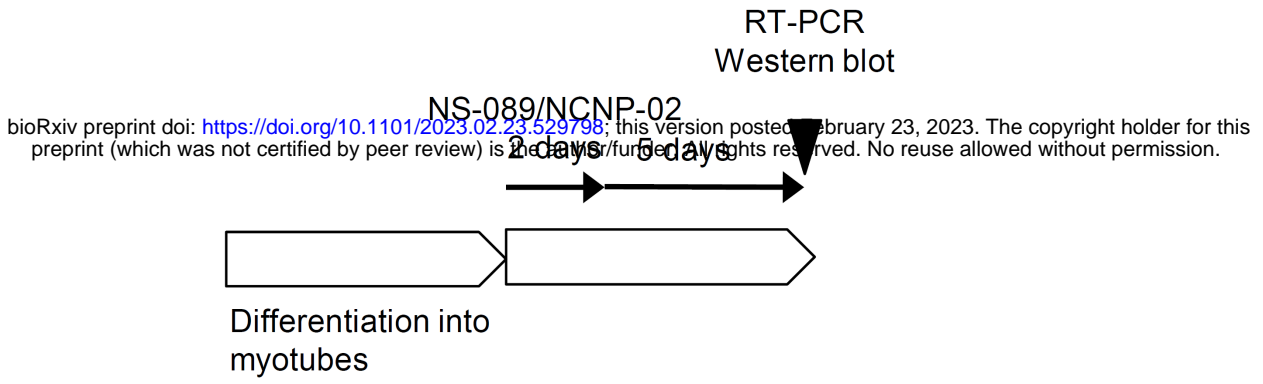

B

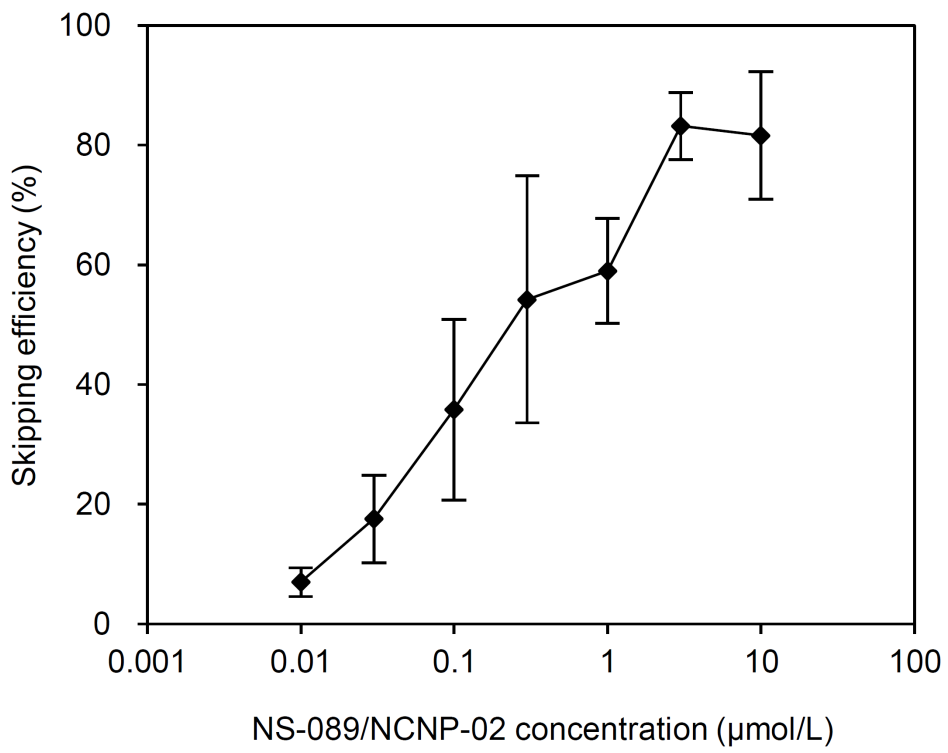

Figure 3

A

Concentration of NS-089/NCNP-02

bioRxiv preprint doi: <https://doi.org/10.1101/2023.02.23.529798>; this version posted February 23, 2023. The copyright holder for this preprint (which was not certified by peer review) is the author/funder. All rights reserved. No reuse allowed without permission.

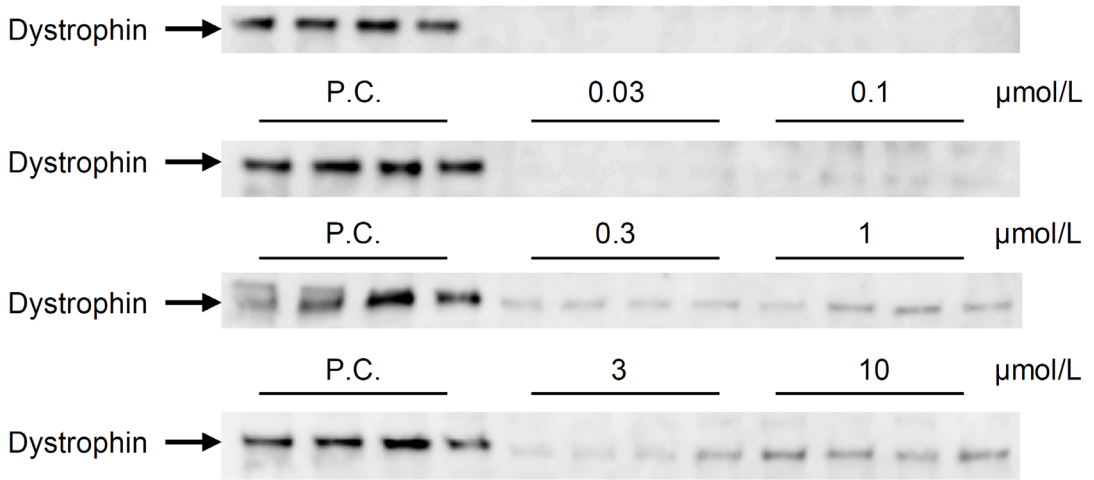

B

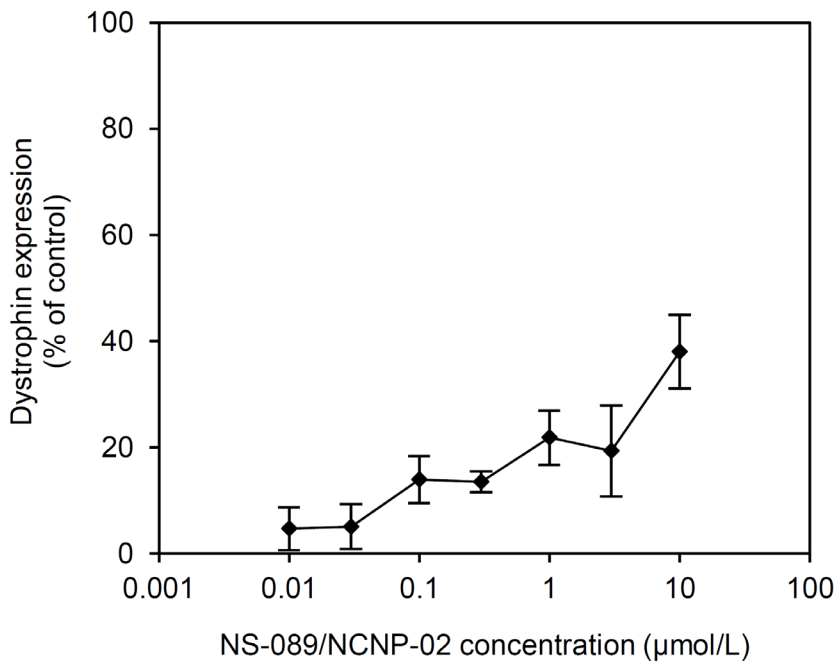

Figure 4

A

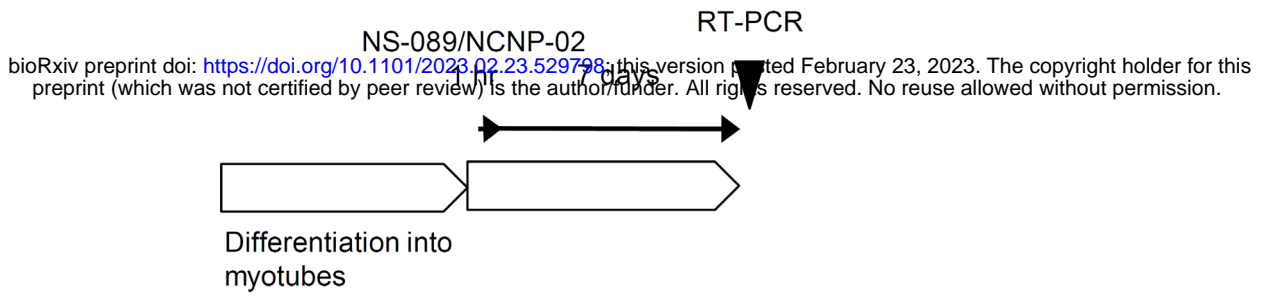

B

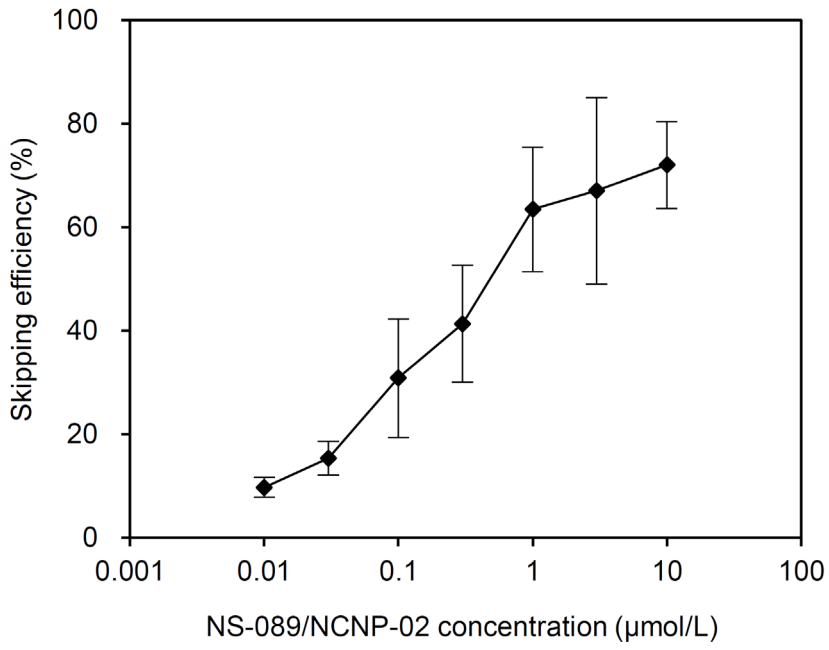

Figure 5

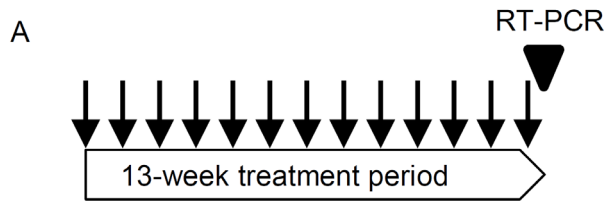

bioRxiv preprint doi: <https://doi.org/10.1101/2023.02.23.529798>; this version posted February 23, 2023. The copyright holder for this preprint (which was not certified by peer review) is the author/funder. All rights reserved. No reuse allowed without permission.

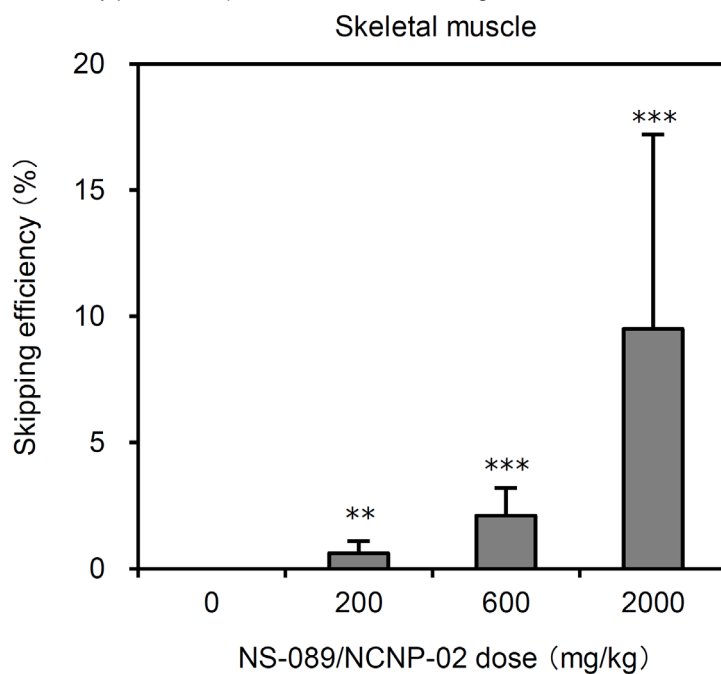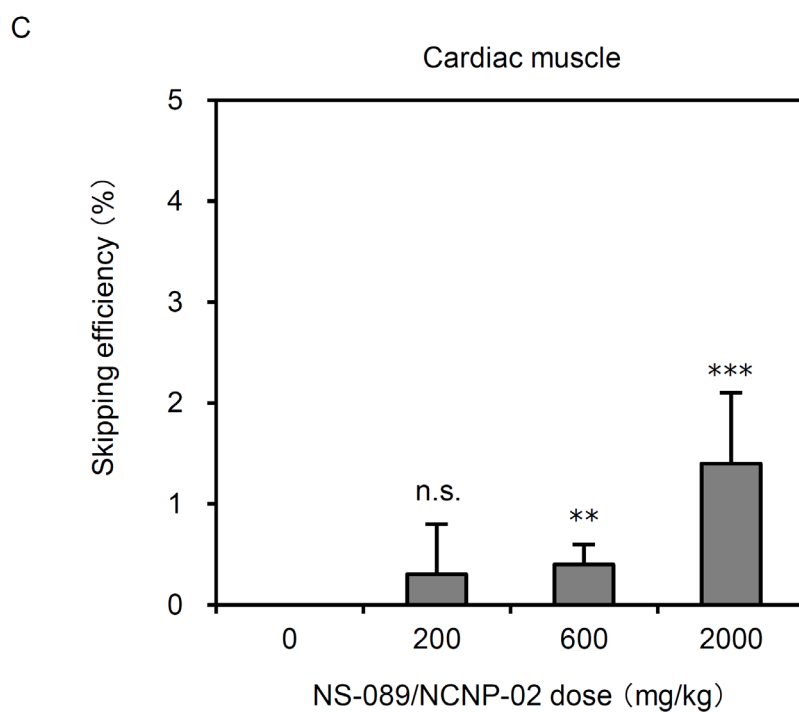

Figure 6



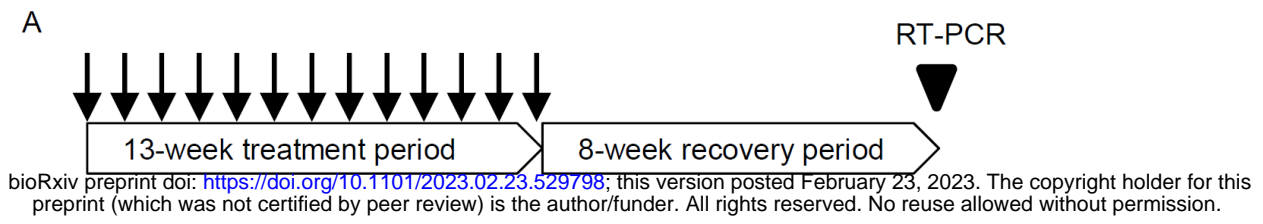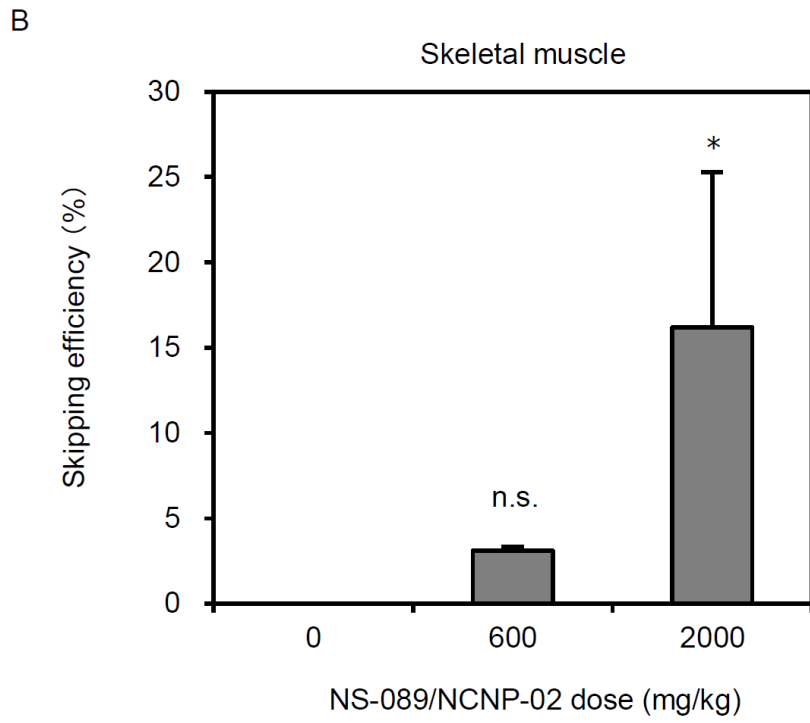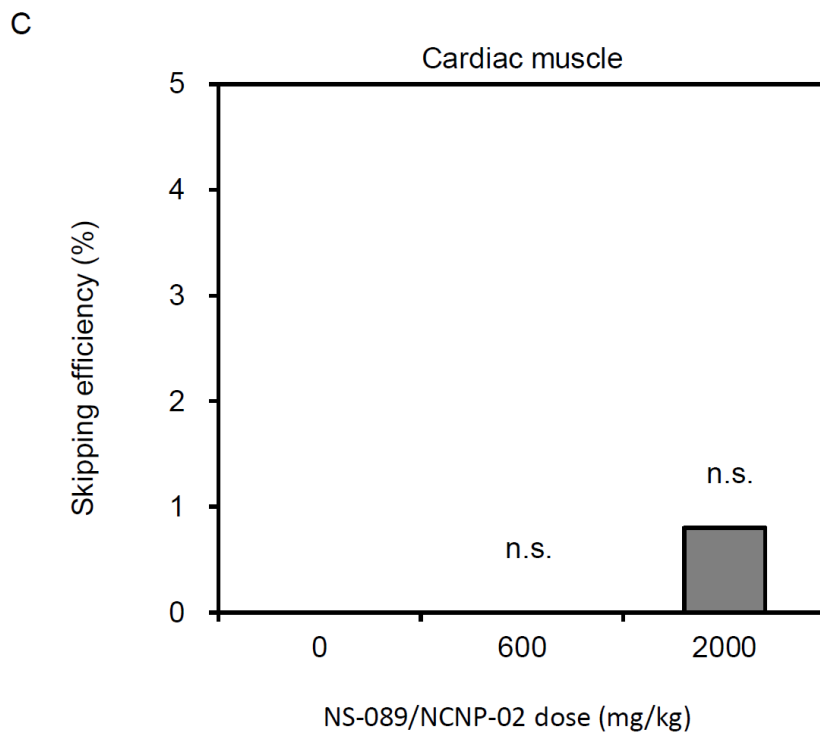

Figure 7

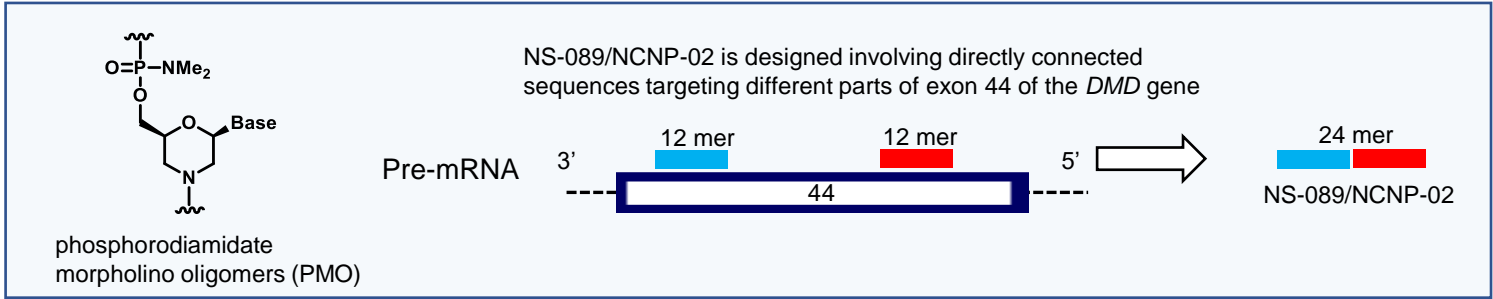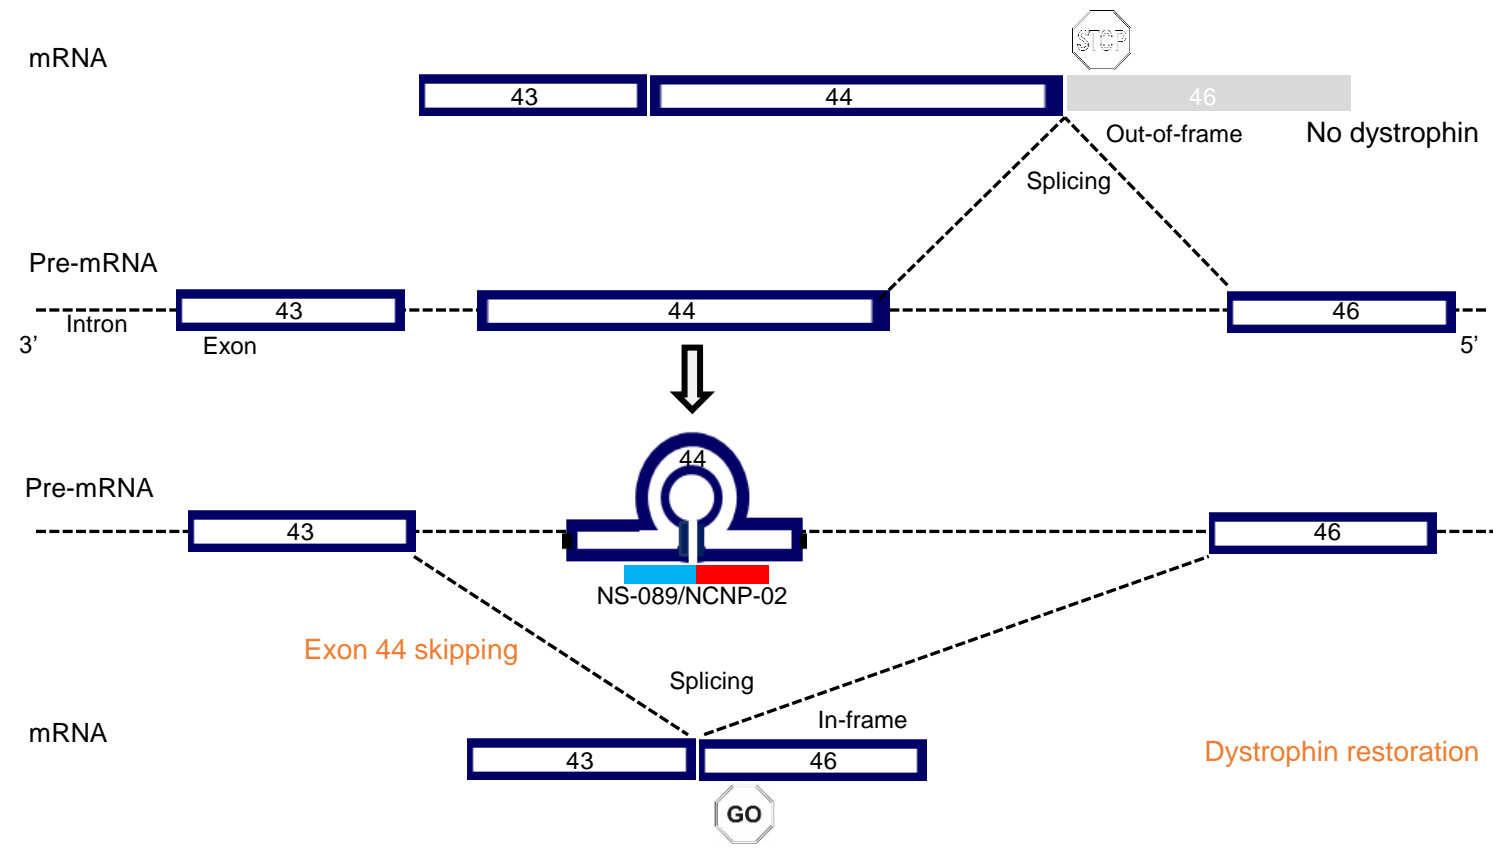

Source: https://www.biorxiv.org/content/10.1101/2023.02.23.529798v1.full.pdf
